# Supplementary material for: Standard Setting for Dental Knowledge Tests: Insights from Judge Feedback and Focus Groups
Source: Research Square preprint supplement (doi:10.21203/rs.3.rs-7347939/v1), 2025-09-24
Supplement: Supplementary file 1 [file 43f237a5e0b60b92e28c5b3f.docx]

**Supplementary file 2**

**Focus Group Discussion (FGD) Guide**

**Focus group discussions (divided into two groups)**

At the end of the Standard setting workshop and training, focus group discussions will be carried out by the research team, with six participants in a group. Each FGD is expected to last approximately 45–60 minutes, depending on how much participants wish to share. The purpose of the FGD is to explore participants’ opinions, experiences, and preferences regarding the use of different standard setting methods in determining pass marks.

Each participant will be assigned a research ID prior to the discussion. Before the session begins, participants will write their research ID on a sticker so that they can be addressed by ID rather than by name, ensuring anonymity throughout the discussion.

**Setting:** The FGDs will be held in a quiet, closed meeting room. Participants will be seated in a circle, with their research ID labels placed in front of them. Each group will be guided by a facilitator, who is also a member of the research team. An encrypted voice recorder will be used to record the discussion.

At the beginning of the session, the facilitator will read the following script to participants:

“Hi, thank you for attending the standard setting workshop and training, I hope everyone had a great time in learning standard setting techniques. his is the final part of our study, where we aim to explore your experiences as panel members throughout the standard setting exercise in determining pass marks.

It is important that we audio record this discussion. If you choose not to allow audio recording, unfortunately, you will not be able to participate. You may leave the discussion at any time should you wish to do so. The discussion will be recorded using an encrypted audio recorder. The audio files will be pseudonymised before being digitally stored, transcribed, and securely saved on a University of Manchester computer server. Please be assured that confidentiality will be maintained, and only anonymised data will be published, with no reference to individuals.

We kindly ask that all participants uphold the principles of respect and professionalism throughout the discussion, respect the privacy of others, and maintain confidentiality even after the discussion has concluded."

**The questions listed are guides and may not need to ask if the participants could talk about how their perception of how faculty make the pass/fail decision. (refer to ppt) (each question maximum 10 mins)**

1. Based on the survey today, we noticed more participants are convinced of the defensibility of X methods in one-best answer questions, what is the reason behind it? Any other who would like to add on to this? Any other who are more convinced of Y method? What is the reason behind it?
2. Based on the survey today, we noticed more participants are more convinced of the defensibility of X methods in short answer question, what is the reason behind it? Any other who would like to add on to this? Any other who are more convinced of Y method? What is the reason behind it?
3. I can see that some of the participants are more confident to practise/apply method X in the assessment (depending on the result). What is the reason behind it? Any other who would like to add on to this? Any other who are more confident of Y method? What is the reason behind it?
4. How do you feel during individual rating (round 2) compares to the rating after group discussion (round 3)?
5. When making the standard setting, in terms of thinking process, (thought process is how you form and organize your thoughts. - including reasoning, problem solving, judging, and remembering). You think which is more demanding/ difficult to make judgement and your reason?
6. If we were to apply modified Angoff methods for our final examination, what are the challenges and how to overcome? (challenges example in terms of resources, learning the process in making judgement and implementation).
7. If we were to apply Ebel methods for our final examination, what are the challenges and how to overcome? (challenges example in terms of resources, learning the process in making judgement and implementation)
