# Supplementary material for: Standard Setting for Dental Knowledge Tests: Insights from Judge Feedback and Focus Groups
Source: Research Square preprint supplement (doi:10.21203/rs.3.rs-7347939/v1), 2025-09-24
Supplement: Supplementary file 2 [file 7ea42a5f4028ff4e377a5bb7.docx]

**Supplementary file 4**

Mean and standard deviation of judges’ responses to each statement after Round 1, 2 and 3 of standard setting meetings (Questionnaire Part 2 & Part 3)

| **Statement** | **Group** | **N** | **Modified Angoff** | | **Ebel** | | **p-valueb** |
| --- | --- | --- | --- | --- | --- | --- | --- |
| **Mean** | **SD** | **Mean** | **SD** |
| **After Round 1 standard setting exercise1** |  |  |  |  |  |  |  |
| 1. I am referring to the course learning outcome and the relevant criteria when deciding on the standard for the test questions. | **A** | 6 | 3.33 | .516 | 3.83 | .753 | .180 |
| **B** | 6 | 4.17 | .753 | 4.17 | .753 | 1.000 |
| **Total** | 12 | 3.75 | .754 | 4.00 | .739 |  |
| **p-valuea** |  | .093 |  | .485 |  |  |
| 1. I am referring to the “competencies of new dental graduate" (version 2021) outlined by the Malaysian Dental Council when deciding on the standard for the test questions. | **A** | 6 | 3.67 | .516 | 3.83 | .753 | .655 |
| **B** | 6 | 3.67 | .816 | 3.83 | .753 | .317 |
| **Total** | 12 | 3.67 | .651 | 3.83 | .718 |  |
| **p-valuea** |  | .937 |  | 1.000 |  |  |
| 1. I am thinking about the performance levels of students among the Year 5 students in the decision on standard-set test questions, rather than focusing on the relevant criteria that are needed in the standard. | **A** | 6 | 4.33 | .516 | 4.33 | .516 | 1.00 |
| **B** | 6 | 3.83 | .753 | 4.00 | .632 | .317 |
| **Total** | 12 | 4.08 | .669 | 4.17 | .577 |  |
| **p-valuea** |  | .310 |  | .485 |  |  |
| 1. I understood how to complete my Round 1 ratings. | **A** | 6 | 4.33 | .516 | 4.50 | .548 | .317 |
| **B** | 6 | 4.17 | .408 | 4.17 | .408 | 1.000 |
| **Total** | 12 | 4.25 | .452 | 4.33 | .492 |  |
| **p-valuea** |  | .699 |  | .394 |  |  |
| 1. I am confident in my Round 1 ratings. | **A** | 6 | 3.67 | .816 | 3.50 | 1.049 | .317 |
| **B** | 6 | 3.50 | 1.049 | 3.67 | 1.033 | .785 |
| **Total** | 12 | 3.58 | .900 | 3.58 | .996 |  |
| **p-valuea** |  | .818 |  | .818 |  |  |
| 1. The facilitators helped to answer questions and to ensure that everyone’s input was respected and valued. | **A** | 6 | 4.50 | .837 | 4.50 | .837 | 1.000 |
| **B** | 6 | 4.00 | 1.265 | 4.00 | .894 | 1.000 |
| **Total** | 12 | 4.25 | 1.055 | 4.25 | .866 |  |
| **p-valuea** |  | .589 |  | .394 |  |  |
| 1. The timing and pace of Round 1 were appropriate. | **A** | 6 | 4.17 | .753 | 4.33 | .816 | .564 |
| **B** | 6 | 4.67 | .516 | 4.33 | .516 | .157 |
| **Total** | 12 | 4.42 | .669 | 4.33 | .651 |  |
| **p-valuea** |  | .310 |  | .937 |  |  |
| **After Round 2 standard setting exercise2** |  |  |  |  |  |  |  |
| 1. I am referring to the course learning outcome and the relevant criteria when deciding on the standard for the test questions. | **A** | 6 | 3.83 | .753 | 4.17 | .753 | .157 |
| **B** | 6 | 4.00 | .632 | 4.17 | .753 | .317 |
| **Total** | 12 | 3.92 | .669 | 4.17 | .718 |  |
| **p-valuea** |  | .699 |  | 1.000 |  |  |
| 1. I am referring to the “competencies of new dental graduate" (version 2021) outlined by the Malaysian Dental Council when deciding on the standard for the test questions. | **A** | 6 | 4.00 | .632 | 4.17 | .753 | .317 |
| **B** | 6 | 3.83 | .753 | 4.00 | .632 | .317 |
| **Total** | 12 | 3.92 | .669 | 4.08 | .669 |  |
| **p-valuea** |  | .699 |  | .699 |  |  |
| 1. I am thinking about the performance levels of students among the Year 5 students in the decision on standard-set test questions, rather than focusing on the relevant criteria that are needed in the standard. | **A** | 6 | 4.50 | .548 | 4.50 | .548 | 1.000 |
| **B** | 6 | 4.17 | .753 | 4.00 | .632 | .317 |
| **Total** | 12 | 4.33 | .651 | 4.25 | .622 |  |
| **p-valuea** |  | .485 |  | .240 |  |  |
| 1. The passing score by other judges provided before the beginning of Round 2 ratings (ie my ratings and others’ ratings) was helpful. | **A** | 6 | 4.67 | .516 | 4.50 | .548 | .317 |
| **B** | 6 | 4.17 | .753 | 4.17 | .753 | 1.000 |
| **Total** | 12 | 4.42 | .669 | 4.33 | .651 |  |
| **p-valuea** |  | .310 |  | .485 |  |  |
| 1. I understood how to complete my Round 2 ratings. | **A** | 6 | 4.67 | .516 | 4.67 | .516 | 1.000 |
| **B** | 6 | 4.33 | .516 | 4.17 | .753 | .564 |
| **Total** | 12 | 4.50 | .522 | 4.42 | .669 |  |
| **p-valuea** |  | .394 |  | .310 |  |  |
| 1. I am confident in my Round 2 ratings. | **A** | 6 | 4.50 | .548 | 4.17 | .753 | .157 |
| **B** | 6 | 4.33 | .516 | 3.67 | 1.033 | .102 |
| **Total** | 12 | 4.42 | .515 | 3.92 | .900 |  |
| **p-valuea** |  | .699 | .485 |  |  |
| 1. The facilitators helped to answer questions and to ensure that everyone’s input was respected and valued. | **A** | 6 | 4.67 | .516 | 4.67 | .516 | 1.000 |
| **B** | 6 | 4.17 | .983 | 4.00 | .894 | .317 |
| **Total** | 12 | 4.42 | .793 | 4.33 | .778 |  |
| **p-valuea** |  | .485 |  | .240 |  |  |
| 1. The timing and pace of Round 2 were appropriate. | **A** | 6 | 4.67 | .516 | 4.33 | .816 | .157 |
| **B** | 6 | 4.67 | .516 | 4.33 | .516 | .157 |
| **Total** | 12 | 4.67 | .492 | 4.33 | .651 |  |
|  | **p-valuea** |  | 1.000 |  | .937 |  |  |
| **After Round 3 standard setting exercise3** |  |  |  |  |  |  |  |
| 1. I am referring to the course learning outcome and the relevant criteria when deciding on the standard for the test questions. | **A** | 6 | 4.17 | .753 | 4.17 | .753 | 1.000 |
| **B** | 6 | 4.00 | .632 | 4.00 | .632 | 1.000 |
| **Total** | 12 | 4.08 | .669 | 4.08 | .669 |  |
| **p-valuea** |  | .652 |  | .652 |  |  |
| 1. I am referring to the “competencies of new dental graduate" (version 2021) outlined by the Malaysian Dental Council when deciding on the standard for the test questions. | **A** | 6 | 4.17 | .753 | 4.33 | .816 | .317 |
| **B** | 6 | 3.83 | .753 | 4.00 | .632 | .317 |
| **Total** | 12 | 4.00 | .739 | 4.17 | .718 |  |
| **p-valuea** |  | .434 |  | .382 |  |  |
| 1. I am thinking about the performance levels of students among the Year 5 students in the decision on standard-set test questions, rather than focusing on the relevant criteria that are needed in the standard. | **A** | 6 | 4.50 | .548 | 4.50 | .548 | 1.000 |
| **B** | 6 | 4.00 | .632 | 4.00 | .632 | 1.000 |
| **Total** | 12 | 4.25 | .622 | 4.25 | .622 |  |
| **p-valuea** |  | .171 |  | .171 |  |  |
| 1. The passing score by other judges provided before the beginning of Round 3 ratings (ie my ratings and others’ ratings) was helpful. | **A** | 6 | 4.67 | .516 | 4.50 | .548 | .317 |
| **B** | 6 | 4.67 | .516 | 4.50 | .548 | .317 |
| **Total** | 12 | 4.67 | .492 | 4.50 | .522 |  |
| **p-valuea** |  | 1.000 |  | 1.000 |  |  |
| 1. There was an equal opportunity for everyone in my group to contribute his/her ideas and opinions. | **A** | 6 | 4.67 | .516 | 4.67 | .516 | 1.00 |
| **B** | 6 | 4.83 | .408 | 4.67 | .516 | .317 |
| **Total** | 12 | 4.75 | .452 | 4.67 | .492 |  |
|  | **p-valuea** |  | .523 |  | 1.000 |  |  |
| 1. The group discussion before the Round 3 ratings was helpful. | **A** | 6 | 4.67 | .516 | 4.67 | .516 | 1.000 |
| **B** | 6 | 4.67 | .516 | 4.67 | .516 | 1.000 |
| **Total** | 12 | 4.67 | .492 | 4.67 | .492 |  |
| **p-valuea** |  | 1.000 |  | 1.000 |  |  |
| 1. I understood how to complete my Round 3 ratings. | **A** | 6 | 4.67 | .516 | 4.67 | .516 | 1.000 |
| **B** | 6 | 4.67 | .516 | 4.33 | .516 | .157 |
| **Total** | 12 | 4.67 | .492 | 4.50 | .522 |  |
| **p-valuea** |  | 1.000 |  | .296 |  |  |
| 1. I am confident in my Round 3 ratings. | **A** | 6 | 4.67 | .516 | 4.50 | .548 | .317 |
| **B** | 6 | 4.67 | .516 | 4.33 | .816 | .157 |
| **Total** | 12 | 4.67 | .492 | 4.42 | .669 |  |
| **p-valuea** |  | 1.000 |  | .789 |  |  |
| 1. The facilitators helped to answer questions and to ensure that everyone’s input was respected and valued. | **A** | 6 | 4.67 | .516 | 4.67 | .516 | 1.000 |
| **B** | 6 | 4.33 | .816 | 4.33 | .816 | 1.000 |
| **Total** | 12 | 4.50 | .674 | 4.50 | .674 |  |
| **p-valuea** |  | .465 |  | .465 |  |  |
| 1. The timing and pace of Round 3 were appropriate. | **A** | 6 | 4.67 | .516 | 4.83 | .408 | .317 |
| **B** | 6 | 4.50 | .548 | 4.50 | .548 | 1.000 |
| **Total** | 12 | 4.25 | .622 | 4.67 | .492 |  |
|  | **p-valuea** |  | .575 |  | .241 |  |  |
| **Note**: Likert’s scale: 1=Strongly disagree, 2=Disagree, 3=Neutral, 4=Agree, 5=Strongly Agree  1 – Feedback Questionnaire 2.1 and 3.1, 2 – Feedback Questionnaire 2.2 and 3.2, 3 – Feedback Questionnaire 2.3 and 3.3  a – Mann-Whitney U-test, b- Wilcoxon signed ranks test | | | | | | | |
