# Supplementary material for: Standard Setting for Dental Knowledge Tests: Insights from Judge Feedback and Focus Groups
Source: Research Square preprint supplement (doi:10.21203/rs.3.rs-7347939/v1), 2025-09-24
Supplement: Supplementary file 3 [file c28211d667ecea440f5a1991.docx]

| Feedback questionnaire | Stages to collect the feedback | Close ended question | Open-ended questions |
| --- | --- | --- | --- |
| Part 1 | After first day lectures, before start of standard setting meting | 11 items- five-point Likert scale | Is there any comments or suggestions you would like to share with us? |
| Part 2.1 (MA)  Part 3.1 (Ebel) | After reviewing the judges' Round 1 ratings | 7 items- five-point Likert scale | 1. Were there any moments that you were not sure of your pass mark? If so, why was it difficult to decide? 2. Describe any reservations or doubts you have about your item ratings. |
| Part 2.2 (MA)  Part 3.2 (Ebel) | After reviewing the judges' Round 2 ratings | 8 items- five-point Likert scale | 1. Please explain any changes you made to the way you carried out your Round 2 item ratings. |
| Part 2.3 (MA)  Part 3.3 (Ebel) | After reviewing the judges' Round 3 ratings | 10 items- five-point Likert scale | 1. Please explain any changes you made to the way you carried out your Round 3 item ratings. |
| Part 4a, b, c, d | After completing all standard setting meetings | 4a. General: 5 items- five-point Likert scale  4b. Level of reliance on information: 5 items- four-level scale  4c. Comparison of standard setting methods: 11 items- five-point Likert scale  4d. Judges’ preference on standard setting methods: 2 items- multiple-choice | 1. How do you describe your decision-making process (analyse and interpret) and feeling when standard setting the questions using Modified Angoff method? 2. How do you describe your decision-making process (analyse and interpret) and feeling when standard setting the questions using Ebel method? 3. Is there anything else you would like to share with us? |
| MA = modified Angoff | | | |

**Supplementary file 1**

**Summary on the Feedback Questionnaire for judges**
