# Supplementary material for: Standard Setting for Dental Knowledge Tests: Insights from Judge Feedback and Focus Groups
Source: Research Square preprint supplement (doi:10.21203/rs.3.rs-7347939/v1), 2025-09-24
Supplement: Supplementary file 4 [file eaa6f914ee0c586790ab6fe2.docx]

# Supplementary file 3

Mean and standard deviation of judges’ responses to each statement after attending lectures (Part 1) and after attending all standard setting meetings (Part 4a)

| **Statement** | Group | **N** | **Mean** | **Std. Deviation** | **p-valuea** |
| --- | --- | --- | --- | --- | --- |
| **After attending lectures** |  |  |  |  |  |
| 1. The lecture session provided a clear overview of the purpose of standard-setting. | A | 6 | 4.67 | .516 | .269 |
| B | 6 | 4.33 | .516 |  |
| Total | 12 | 4.50 | .522 |  |
| 1. The training and practice exercises helped me understand how to perform the task. | A | 6 | 4.00 | .632 | .336 |
| B | 6 | 4.33 | .516 |  |
| Total | 12 | 4.17 | .577 |  |
| 1. I have a good understanding of the role of judges in this standard-setting activity | A | 6 | 4.50 | .548 | .201 |
| B | 6 | 3.83 | .983 |  |
| Total | 12 | 4.17 | .835 |  |
| 1. I understand the Modified Angoff standard-setting methods described during training. | A | 6 | 4.33 | .516 | .715 |
| B | 6 | 4.17 | .753 |  |
| Total | 12 | 4.25 | .622 |  |
| 1. I understand the Ebel standard-setting methods described during training. | A | 6 | 4.17 | .408 | .523 |
| B | 6 | 4.33 | .516 |  |
| Total | 12 | 4.25 | .452 |  |
| 1. The large and small group discussion aided my understanding of the process. | A | 6 | 4.17 | .753 | .652 |
| B | 6 | 4.00 | .632 |  |
| Total | 12 | 4.08 | .669 |  |
| 1. I felt comfortable contributing to the small group discussions. | A | 6 | 4.17 | 1.169 | .523 |
| B | 6 | 4.17 | .408 |  |
| Total | 12 | 4.17 | .835 |  |
| 1. The practise using the standard-setting method helped me understand how to apply the method. | A | 6 | 4.17 | .753 | 1.000 |
| B | 6 | 4.17 | .753 |  |
| Total | 12 | 4.17 | .718 |  |
| 1. The facilitators helped me understand the standard-setting process. | A | 6 | 4.67 | .516 | .465 |
| B | 6 | 4.33 | .816 |  |
| Total | 12 | 4.50 | .674 |  |
| 1. The timing and pace of the training were appropriate. | A | 6 | 4.33 | .816 | .859 |
| B | 6 | 4.33 | .516 |  |
| Total | 12 | 4.33 | .651 |  |
| 1. Overall, I feel prepared to begin the standard-setting task. | A | 6 | 4.00 | .632 | .652 |
| B | 6 | 4.17 | .753 |  |
| Total | 12 | 4.08 | .669 |  |
| **TOTAL** | A | 6 | 4.29 | .562 | .809 |
|  | B | 6 | 4.20 | .573 |  |
|  | **Total** | **12** | **4.24** | **.543** |  |
| **After all standard setting meetings** |  |  |  |  |  |
| 1. Overall, the facilities and food service provided have helped to create a good working environment. | A | 6 | 4.50 | .548 | 1.00 |
| B | 6 | 4.50 | .548 |  |
| Total | 12 | 4.50 | .522 |  |
| 1. Overall, the training in the standard-settings purpose and methods was clear. | A | 6 | 4.67 | .516 | 1.00 |
| B | 6 | 4.67 | .516 |  |
| Total | 12 | 4.67 | .492 |  |
| 1. Overall, I am confident that I was able to apply the standard-setting method appropriately. | A | 6 | 3.83 | .408 | .176 |
| B | 6 | 4.17 | .408 |  |
| Total | 12 | 4.00 | .426 |  |
| 1. Overall, the standard-setting procedures allowed me to use my experience and expertise to recommend passing scores for the items in CDC final examination paper. | A | 6 | 4.33 | .816 | .859 |
| B | 6 | 4.33 | .516 |  |
| Total | 12 | 4.33 | .651 |  |
| 1. Overall, everyone was able to contribute to the group discussions and no one unfairly dominated the discussions. | A | 6 | 4.83 | .408 | 1.00 |
| B | 6 | 4.83 | .408 |  |
| Total | 12 | 4.83 | .389 |  |
| **TOTAL** | A | 6 | 4.43 | .427 | .934 |
|  | B | 6 | 4.50 | .303 |  |
|  | **Total** | **12** | **4.47** | **.356** |  |
| Ratings ranged from 1=Strongly disagree, 2=Disagree, 3=Neutral, 4=Agree, 5=Strongly Agree  a- Mann-Whitney U-test | | | |  |  |
